# Supplementary material for: A ratiometric fluorescence strategy based on polyethyleneimine surface-modified carbon dots and Eosin Y for the ultrasensitive determination of protamine and trypsin
Source: Royal Society of Chemistry journal article supplement (doi:10.1039/d1an02138a), 2021-12-31
Supplement: d1an02138a1.pdf [file d1an02138a1.pdf]

1

## Electronic Supporting Information

2 **A ratiometric fluorescence strategy based on polyethyleneimine**  
3 **surface-modified carbon dots and Eosin Y for ultrasensitive**  
4 **determination of protamine and trypsin.**

5 Wenying Sun <sup>a</sup>, Feng Zhang <sup>a</sup>, Mengke Wang <sup>a</sup>, Nan Wang <sup>a</sup>, Guannan Wang <sup>b,\*</sup>, Xingguang Su <sup>a,\*</sup>

6 *a. Department of Analytical Chemistry, College of Chemistry, Jilin University, Changchun 130012, China*

7 *b. College of Medical Engineering, Jining Medical University, Jining, 272067, China*

8

9

10

11

12

13

14 *\*Corresponding author*

15 *Xingguang Su*

16 *Tel.: +86-431-85168352*

17 *E-mail address: [suxg@jlu.edu.cn](mailto:suxg@jlu.edu.cn)*

18 *Guannan Wang*

19 *E-mail address: [chemwangguannan@126.com](mailto:chemwangguannan@126.com)*

20

21

22

## 1 **Reagents**

2 The chemical reagents used in the experiments are of analytical grade without  
3 further purification. The deionized water used in this experiment has a resistivity  
4 greater than  $18 \text{ M}\Omega \text{ cm}^{-1}$ . PEI was provided by Aladdin Industrial Company. Tris-  
5 HCl was purchased from Sinopharm Chemical Reagent Co. Ltd. Eosin Y, Protamine,  
6 Arg, AA, Fru, Cys, GSH, Gly, Asp, ATP, Urease, G-ox, LZM and Pepsinand reduced  
7 L-glutathione (GSH) were purchased from Sangon Biotech (Shanghai). Potassium  
8 Chloride, Magnesium Chloride, Zinc Sulfate Sodium Chloride and Urea were  
9 purchased from Beijing Chemical Works. Glucose and trypsin were purchased from  
10 Aladdin. This experiment used a 10 mM Tris-HCl buffer solution to adjust the pH of  
11 the reaction. And the configured solutions were all stored at  $4^\circ\text{C}$ .

12

## 13 **Instrumentation**

14 Fluorescence (FL) spectra were recorded by a RF-5301 PC  
15 spectrofluorophotometer(Shimadzu, Japan). Ultraviolet-visible (UV-vis) absorption  
16 spectra were acquired with the U-5100 UV-vis spectrophotometer. Powder X-ray  
17 diffraction (XRD) patterns were conducted on a Rigaku D-Max 2550 diffractometer  
18 (Rigaku, Japan). Fourier transform infrared (FT-IR) spectra were recorded on a  
19 Nicolet 400 Fourier transform infrared spectrometer. Transmission electron  
20 microscope (TEM) was collected on a JEM-2100F Transmission Electron Microscope  
21 (JEOL, Japan). All temperature measurements were accomplished by using a water

1 bath. All pH measurements and the configured buffer solutions were performed using  
2 a PHS-3C pH meter (Tuopu Co., Hangzhou, China).

1

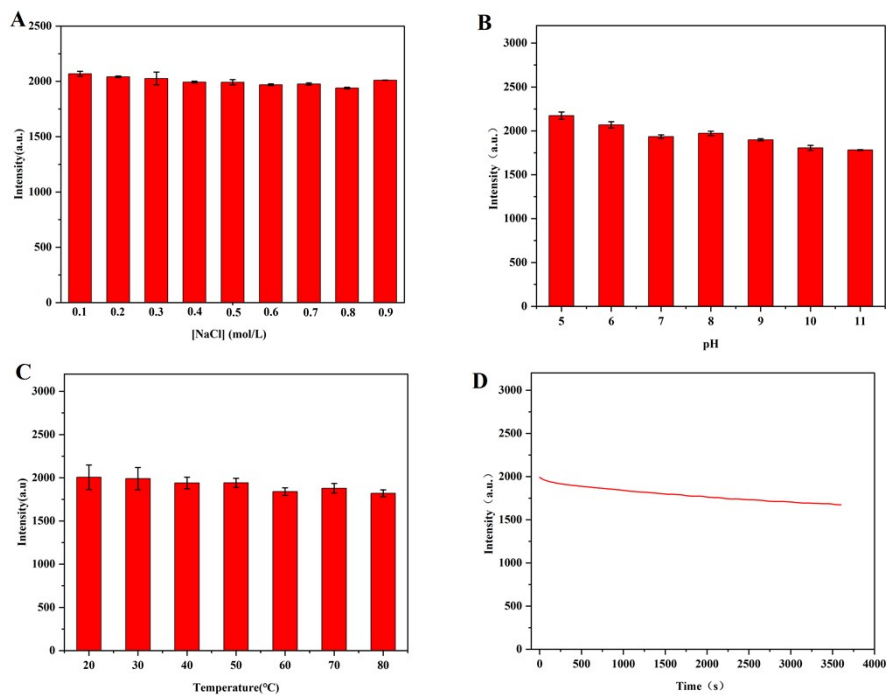

2

3 **Fig. S1.** Influences of (A) Ionic strength, (B) pH values, (C) Temperature, (D) Xenon  
4 lamp irradiation time on the fluorescence of CDs-PEI at 350 nm excitation wavelength.

5

6

7

8

9

10

11

12

13

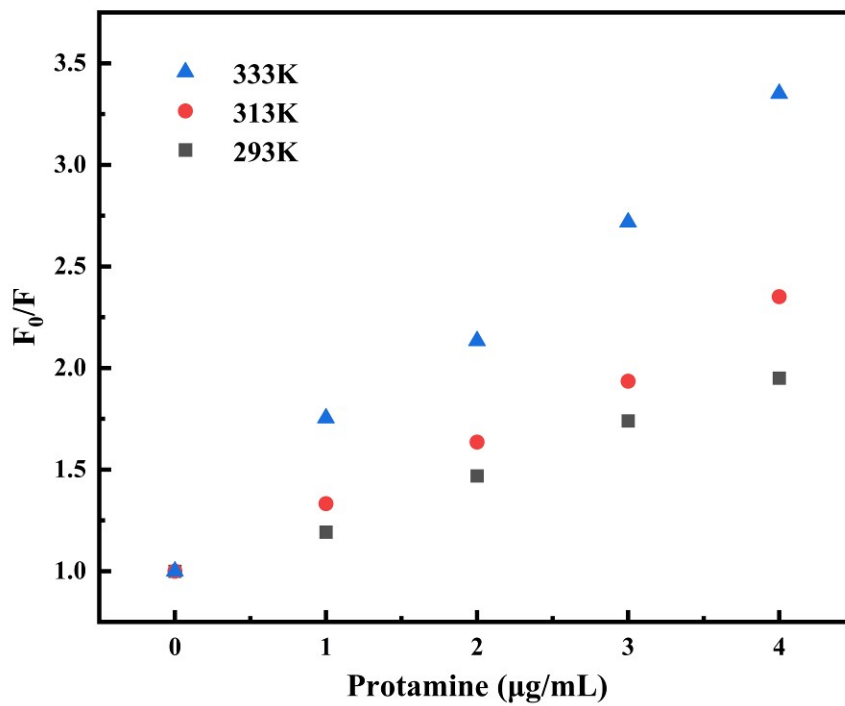

1

2

3 **Fig. S2.** Stern–Volmer curves for the CDs-PEI/Eosin Y/Protamine system at three  
 4 different temperatures. ( $F_0$  and  $F$  were the fluorescence intensity of Eosin Y in the  
 5 absence and presence of protamine, respectively.)

6

1 **Table S1 Comparison with previous methods for the detection of protamine.**

| Methods | Materials | Linear range<br>( $\mu\text{g/mL}$ ) | LOD<br>( $\mu\text{g/mL}$ ) | Reference |
|---------|-----------|--------------------------------------|-----------------------------|-----------|
|---------|-----------|--------------------------------------|-----------------------------|-----------|

| Fluorescence               | water soluble Perylene diimides                                   | 0.1-13 µg /mL          | 0.09 µg /mL            | 1            |
|----------------------------|-------------------------------------------------------------------|------------------------|------------------------|--------------|
| Methods                    | Materials                                                         | Linear range           | LOD                    | Reference    |
| <del>Electrochemical</del> | <del>poly(thionine) modified glassy</del>                         | <del>4-22 µg /mL</del> | <del>0.28 µg /mL</del> | <del>2</del> |
| Chemiluminescence          | gold nanoclusters<br>carbon electrode<br>(Au NCs)                 | 2.4-48 µg/mL           | 0.19 µg/mL             | 7            |
| Colorimetric               | Anionic poly(2-(2-(4-methylthiophen-3-ylloxy)ethyl)malonate acid) | 0.1-30 µg /mL          | 0.1 µg /mL             | 3            |
| Fluorescence               | a pyrene derivative                                               | 0.5–8 µg/mL            | 0.5 µg/mL              | 4            |
| Fluorescence               | BZA-BOD@ZIF-90                                                    | 0.25-0.4 µg/mL         | 0.07 µg /mL            | 5            |
| Robust reverse phase-HPLC  | Zorbax-SB C8 Column                                               | 0.5–5 mg/ml            | 0.06 mg/mL             | 6            |
| Fluorescence               | PEI-CDs and Eosin Y                                               | 0.1-5.2 µg/mL          | 0.03 µg/mL             | This work    |

1

2

3

4

5

6

|                   |                                                                        |                                 |                              |           |
|-------------------|------------------------------------------------------------------------|---------------------------------|------------------------------|-----------|
| Chemiluminescence | bovine serum albumin (BSA)-stabilized gold nanoclusters (Au NCs)       | 0.01-50 $\mu\text{g}/\text{mL}$ | 9 ng/mL                      | 8         |
| Electrochemical   | luminol and black phosphorus nanosheets                                | 0.1 – 5 $\mu\text{g}/\text{mL}$ | 63.3 ng/mL                   | 9         |
| Colorimetric      | silver nanoparticles (AgNPs)                                           | 2.5-200 ng/mL                   | 2 ng/mL                      | 10        |
| Fluorescence      | silicon quantum dots (SiQDs) and triangular silver nanoprisms (TSNPRs) | 0-40 ng/mL                      | 8 ng/mL                      | 11        |
| Fluorescence      | AgInZnS QD                                                             | 0.1-4 $\mu\text{g}/\text{mL}$   | 0.04 $\mu\text{g}/\text{mL}$ | 12        |
| Fluorescence      | PEI-CDs and Eosin Y                                                    | 0.4-56 ng/mL                    | 0.21 ng/mL                   | This work |

1 **Table S2** Comparison with previous methods for the detection of trypsin

## 2 References

- 3 1. H. Cheng, Y. Zhao, H. Xu, Y. Hu, L. Zhang, G. Song and Z. Yao, *Dyes and Pigments*, 2020, **180**.



- 1 2. H. Y. Huo, H. Q. Luo and N. B. Li, *Microchimica Acta*, 2009, **167**, 195-199.
- 2 3. Z. Yao, W. Ma, Y. Yang, X. Chen, L. Zhang, C. Lin and H. C. Wu, *Org Biomol*  
3 *Chem*, 2013, **11**, 6466-6469.
- 4 4. B. Tang, Y. Yang, G. Wang, Z. Yao, L. Zhang and H. C. Wu, *Org Biomol Chem*,  
5 2015, **13**, 8708-8712.
- 6 5. L. Liu, J. Dai, Y. Ji, B. Shen, X. Zhang and R. J. Linhardt, *Sensors and Actuators B:*  
7 *Chemical*, 2021, **341**.
- 8 6. D. Awotwe-Otoo, C. Agarabi, P. J. Faustino, M. J. Habib, S. Lee, M. A. Khan and  
9 R. B. Shah, *J Pharm Biomed Anal*, 2012, **62**, 61-67.
- 10 7. Y. He, Y. Sui, S. Xu and F. Chen, *RSC Advances*, 2016, **6**, 4657-4662.
- 11 8. X. You, Y. Li, B. Li and J. Ma, *Talanta*, 2016, **147**, 63-68.
- 12 9. H. Liu, H. Yin, Y. Dong, H. Ding and X. Chu, *Analyst*, 2020, **145**, 2204-2211.
- 13 10. P. Miao, T. Liu, X. Li, L. Ning, J. Yin and K. Han, *Biosens Bioelectron*, 2013, **49**,  
14 20-24.
- 15 11. J. Zhou, F. Zhang, R. Zhao, S. Liu, W. Li, F. He, S. Gai and P. Yang, *Sensors and*  
16 *Actuators B: Chemical*, 2021, **340**.
- 17 12. Y. Liu, F. Zhang, X. He, P. Ma, Y. Huang, S. Tao, Y. Sun, X. Wang and D. Song,  
18 *Sensors and Actuators B: Chemical*, 2019, **294**, 263-269.
- 19
